# Supplementary material
Source: PubMed Central journal article supplement (PMC4437799)
Supplement: NIHMS683794-supplement-Supplementary_Information.pdf [file NIHMS683794-supplement-Supplementary_Information.pdf]

# Direct detection and drug-resistance profiling of bacteremias using inertial microfluidics

Han Wei Hou, Roby P. Bhattacharyya, Deborah T. Hung, Jongyoon Han

## Supplementary information

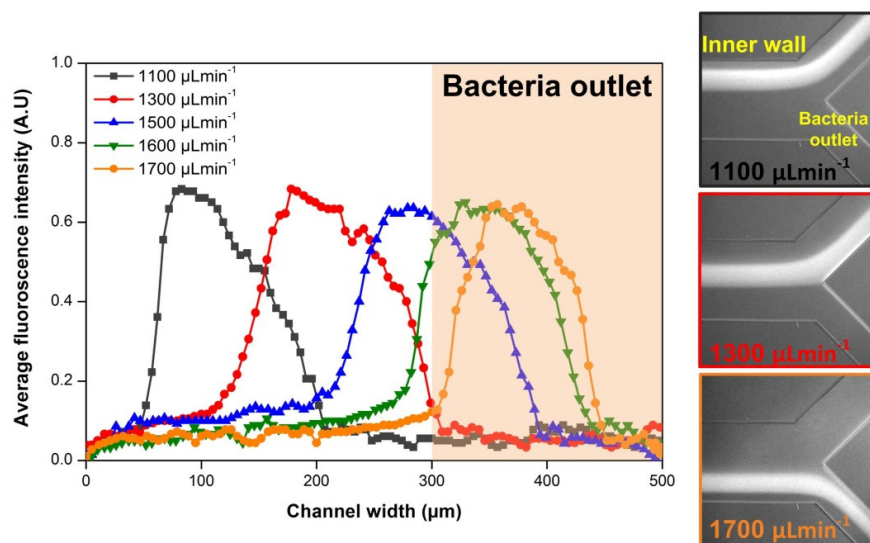

**Figure S1** Average fluorescence intensity linescans indicating normalized distribution of FITC-conjugated *E. coli* bioparticles across the channel width (x-axis origin represents inner wall) prior the outlet bifurcation at different flow rates. Approximate position of the bacteria outlet (outer wall region) is shown on the plot. Corresponding average composite images illustrate efficient collection of bacteria into bottom (bacteria) outlet at a flow rate of 1700  $\mu\text{Lmin}^{-1}$ .

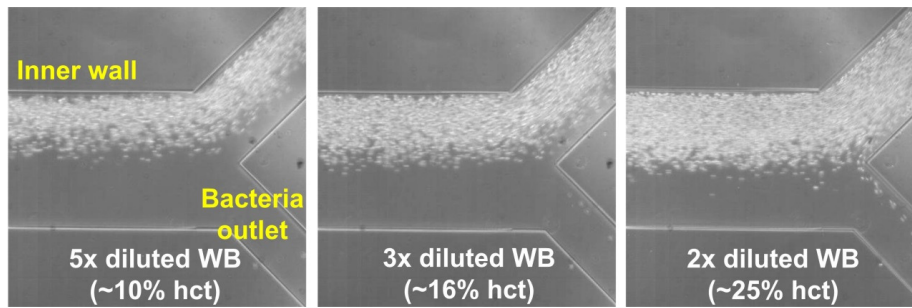

**Figure S2** High speed images indicate broadening of RBCs occupied regions at the channel inner wall for increasing hematocrit (hct) prior outlet bifurcation at a sample flow rate of  $150 \mu\text{Lmin}^{-1}$  ( $1500 \mu\text{Lmin}^{-1}$  for sheath flow (1:10)). 3x diluted whole blood (WB) was chosen for subsequent experiments which resulted in minimal RBCs entering the bacteria outlet (bottom).

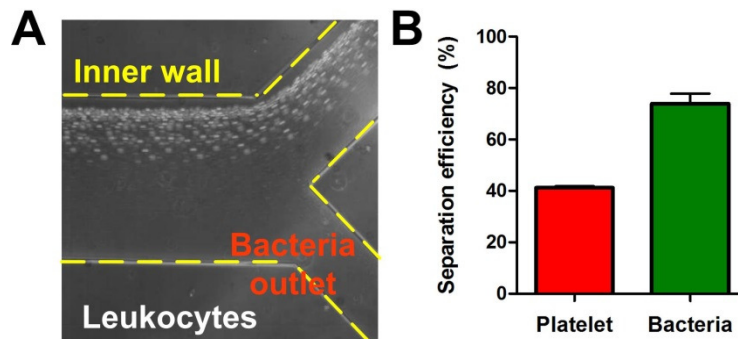

**Figure S3** (A) Averaged composite high speed image represents the tight focusing of larger leukocytes at the inner wall which resulted in complete removal at the bacteria outlet. Yellow dashed lines indicate position of channel walls. (B) Histogram plot showing efficient bacteria recovery (>70%) with lower platelet recovery (~40%) in the sorted samples collected from the bacteria outlet.

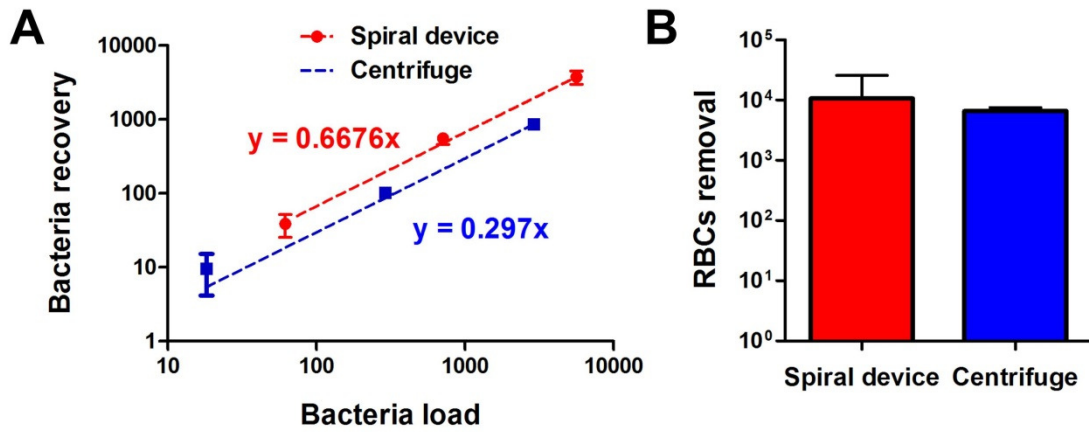

**Figure S4** Separation performance comparison between spiral device and centrifuge. **(A)** Higher bacteria recovery was achieved with the spiral device over a range of bacterial loads (*E. coli*) spiked in 1 mL of whole blood. **(B)** Histogram plot indicating similar RBCs removal efficiency ( $\sim 10^4$ -fold) for both spiral device and centrifuge.

**Figure S5.** rRNA probes for specific detection of *P. aeruginosa* (PsA), *E. coli* (Ec), and *K. pneumoniae* (Kp). Probe targets are highlighted in multiple sequence alignments of (A) 16S and (B) 23S rRNA subunits from these three species. Green = PsA-specific probe; Blue = Ec-specific probe; Red = Kp-specific probe; Purple = dual-specificity probe for either Ec or Kp but not PsA. Mismatches in other species corresponding to the region recognized by each probe are shown in lowercase letters; asterisks below the alignment correspond to regions of conservation across the three species. Specific probe sequences designed to target these regions are shown in supplementary Table S1.

**A.**

```

PsA_16S -----AACGAGAGGTTGCTGTAGAATGCGCGCCTC
Ec_16S  AGAAAAATCCTGAAATTCAGGGTTGACTCTGAAAGAGGAAAGCGTAATATACGCCACCTC
Kp_16S  -AGAAAAATCCTGAAAAACGGGTTGACTCTGAAAGAGGATAGCGTAATATACGCCACCTC
                *****      ***  **  ***  ****

PsA_16S  GGT--GAGACGAAAGCCTTGACCAACTGCTCTTTAACAAGTCGAATCAAGCAATTCGT
Ec_16S  GGCAGAGTGCCTAAAGCGCGTCGCAACTGCTCTTTAACAATTTATCA--GACAATCTGT
Kp_16S  GGCAGAGAGCGCTAAAGCGCGTCGCAACTGCTCTTTAACAATTTATCA--GACAATCTGT
                *      *  *****      ***** *      ****  **

PsA_16S  GTGGGTGCTTGTGATGTAAGACTGGTGATCGCAAGATTATCAGCAACGCAAGTAACACTC
Ec_16S  GTGGGCACTCGAAG---ATAC-----GGATTCTTAACG-----T-
Kp_16S  GTGGGCACTCAAAGTG--ACAT-----GGATTCTTAACG-----T-
                *****  **      *  *      ***** *  *  *      *

PsA_16S  GTGAATTCGAGAGTTTTATCTCTTTTAAAGAGAATGCGATTGCTGAGCCAAGTTTAGGGT
Ec_16S  CGCAAGACGAAAAATGAATACCAAGTCTCAAGAGTGAACACGTAATTCATTACGAAGCTT
Kp_16S  CCTCGGACGAAAAATGAATACCAAGTCTCAAGAGTGAACACGTAATTCATTACGAAGTTT
                *** *  *  ** *  *      *** **      *      *      ** *

PsA_16S  TTTCTCAAACCCAAGCAGTATTGAACTGAAGAGTTTGATCATGGCTCAGATTGAACGCT
Ec_16S  AATCTTTGAGCATCAAACCTTTAAATTGAAGAGTTTGATCATGGCTCAGATTGAACGCT
Kp_16S  AATCTTTGAGCATCAAACCT--TAAATTGAAGAGTTTGATCATGGCTCAGATTGAACGCT
                *      *  *      *  *  *  *****

PsA_16S  GGCGGCAGGCCTAACACATGCAAGTCGAgCGGatgaAGGgAGCtt-----GCTcCtgga
Ec_16S  GGCGGCAGGCCTAACACATGCAAGTCGAAGTCGAAGGTAACAGGAAGCAGCTTGCTGCTTCGCTG
Kp_16S  GGCGGCAGGCCTAACACATGCAAGTCGAgCGGTAgCAcagAGagc--TtgctCTcgGgTG
                ***** *****  ***      *      **      **

PsA_16S  accAGcGGCGGACGGGTGAGTAATGCCTAGGAATCTGCCTGGTAGTGGGGGATAACGTCC
Ec_16S  ACGAGTGGCGGACGGGTGAGTAATGTCTGGGAAACTGCCTGATGGAGGGGGATAACTACT
Kp_16S  ACGAGcGGCGGACGGGTGAGTAATGTCTGGGAAACTGCCTGATGGAGGGGGATAACTACT
                ** ***** ** ***** ***** *  * ***** *

PsA_16S  GGAAACGGGCGCTAATACCGCATACGTCCTGAGGGAGAAAGTGGGGATCTTCGGACCTC
Ec_16S  GGAAACGGTAGCTAATACCGCATAAcgTCgcAAGaccAAAGaGGGGGAcCTTCGGgCCTC
Kp_16S  GGAAACGGTAGCTAATACCGCATAAatgTCgcAAGaccAAAGTGGGGGAcCTTCGGgCCTC
                ***** ***** *  *  *      *** ***** ***** ***

PsA_16S  ACGCTATCAGATGAGCCTAGGTCGGATTAGCTAGTTGGTGGGGTAAAGGCCTACCAAGGC
Ec_16S  ttGCcATCGGATGtGCCcAGaTgGGATTAGCTtGTTGGTGGGGTAAcGGctcACCAAGGC
Kp_16S  AtGCcATCAGATGtGCCcAGaTgGGATTAGCTAGTAgGTGGGGTAAcGGctcACctAGGC
                ** *** ** ** ** * ***** ** ***** ** ** ** **

PsA_16S  GACGATCCGTAACCTGGTCTGAGAGGATGATCAGTCACACTGGAAGTGGAGACACGGTCCAG
Ec_16S  GACGATCCCTAGCTGGTCTGAGAGGATGACCAGCCACACTGGAAGTGGAGACACGGTCCAG
Kp_16S  GACGATCCCTAGCTGGTCTGAGAGGATGACCAGCCACACTGGAAGTGGAGACACGGTCCAG
                ***** ** ***** ***** ***** *****

```

PsA\_16S ACTCCTACGGGAGGCAGCAGTGGGGAATATTGGACAATGGGCGAAAGCCTGATCCAGCCA  
Ec\_16S ACTCCTACGGGAGGCAGCAGTGGGGAATATTGCACAATGGGCGCAAGCCTGATGCAGCCA  
Kp\_16S ACTCCTACGGGAGGCAGCAGTGGGGAATATTGCACAATGGGCGCAAGCCTGATGCAGCCA  
\*\*\*\*\*

PsA\_16S TGCCCGGTGTGTGAAGAAGGCTTCGGATTGTAAAGCACTTTAAGTTGGGAGGAAGGGCA  
Ec\_16S TGCCCGGTGTGTGAAGAAGGCTTCGGGTTGTAAAGTACTTTCAGCGGGGAGGAAGGGAG  
Kp\_16S TGCCCGGTGTGTGAAGAAGGCTTCGGGTTGTAAAGCACTTTCAGCGGGGAGGAAGGCGT  
\*\*\*\*\*

PsA\_16S GTAAGTTAATAACCTTGCTGTTTTGACGTTACCAACAGAATAAGCACC GGCTAACTTCGTG  
Ec\_16S TAAAGTTAATAACCTTTGCTCATTGACGTTACCCGCAGAAGAAGCACC GGCTAACTCCGTG  
Kp\_16S TAAGTTAATAACCTTGCGGCTTACGTTACCCGCAGAAGAAGCACC GGCTAACTCCGTG  
\* \* \* \* \*

PsA\_16S CCAGCAGCCGGTAATACGAAGGTTGCAAGCGTTAATCGGAATTACTGGGCGTAAAGCG  
Ec\_16S CCAGCAGCCGGTAATACGAAGGTTGCAAGCGTTAATCGGAATTACTGGGCGTAAAGCG  
Kp\_16S CCAGCAGCCGGTAATACGAAGGTTGCAAGCGTTAATCGGAATTACTGGGCGTAAAGCG  
\*\*\*\*\*

PsA\_16S CGCGTAGGTGGTTCAGCAAGTTGGATGTGAAATCCCCGGGCTCAACCTGGGAAGTGCATC  
Ec\_16S CACGCAGGCGGTTTGTAAAGTCAAGTGTGAAATCCCCGGGCTCAACCTGGGAAGTGCATC  
Kp\_16S CACGCAGGCGGTTCTGTCAAGTCGATGTGAAATCCCCGGGCTCAACCTGGGAAGTGCATT  
\* \* \* \* \*

PsA\_16S CAAAACTACTGAGCTAGAGTACGGTAGAGGGTGGTGGAAATTCCTGTGTAGCGGTGAAAT  
Ec\_16S TGATACTGGCAAGCTTGAGTCTCGTAGAGGGGGTAGAATTCAGGTGTAGCGGTGAAAT  
Kp\_16S CGAAACTGGCAGGCTAGAGTCTGTAGAGGGGGTAGAATTCAGGTGTAGCGGTGAAAT  
\* \* \* \* \*

PsA\_16S GCGTAGATATAGGAAGAACACCAGTGGCGAAGGCGACCACCTGGACTGATACTGACACT  
Ec\_16S GCGTAGAGATCTGGAGGAATACCGGTGGCGAAGGCGGCCCTGGACGAAGACTGACGCT  
Kp\_16S GCGTAGAGATCTGGAGGAATACCGGTGGCGAAGGCGGCCCTGGACAAAGACTGACGCT  
\*\*\*\*\*

PsA\_16S GAGGTGCGAAAGCGTGGGGAGCAAACAGGATTAGATACCCTGGTAGTCCACGCGTAAAC  
Ec\_16S CAGGTGCGAAAGCGTGGGGAGCAAACAGGATTAGATACCCTGGTAGTCCACGCGTAAAC  
Kp\_16S CAGGTGCGAAAGCGTGGGGAGCAAACAGGATTAGATACCCTGGTAGTCCACGCGTAAAC  
\*\*\*\*\*

PsA\_16S GATGTGCGACTAGCCGTTGGGATCCTTGAGATCTTAGTGGCGAGCTAACGCGATAAGTGC  
Ec\_16S GATGTGCGACTTGAGGTTGTGCCCTTGAGGCGTGGCTTCCGGAGCTAACGCGTTAAGTGC  
Kp\_16S GATGTGCGATTTGAGGTTGTGCCCTTGAGGCGTGGCTTCCGGAGCTAACGCGTTAATGC  
\*\*\*\*\*

PsA\_16S ACCGCTGGGGAGTACGGCCGCAAGGTTAAAACCTCAAATGAATTGACGGGGGCCGCACA  
Ec\_16S ACCGCTGGGGAGTACGGCCGCAAGGTTAAAACCTCAAATGAATTGACGGGGGCCGCACA  
Kp\_16S ACCGCTGGGGAGTACGGCCGCAAGGTTAAAACCTCAAATGAATTGACGGGGGCCGCACA  
\*\*\*\*\*

PsA\_16S AGCGGTGGAGCATGTGGTTTTAATTCGAaGCAACGCGAAGAACCCTTACCTGGcCTTGACAT  
Ec\_16S **AGCGGTGGAGCATGTGGTTTTAATTCGATGCAACGCGAAGAACCCTTACCTGGTCTTGACAT**  
Kp\_16S AGCGGTGGAGCATGTGGTTTTAATTCGATGCAACGCGAAGAACCCTTACCTGGTCTTGACAT  
\*\*\*\*\*

PsA\_16S gCtgaGAACCTTcCAGAGATGgattgGTGCCTTCGGGAACCTCAGACACAGGTGCTGCATG  
Ec\_16S **CCACGGAAGTTTTcCAGAGATGGAATGTGCCTTCGGGA**ACCGTgAGACAGGTGCTGCATG  
Kp\_16S CCACaGAACCTTagCAGAGATGctttgGTGCCTTCGGGAACCTGTGAGACAGGTGCTGCATG  
\* \* \* \* \*

PsA\_16S GCTGTGCTCAGCTCGTGTGCTGAGATGTTGGTTAAGTCCCCTAACGAGCGCAACCCTTG  
Ec\_16S GCTGTGCTCAGCTCGTGTGCTGAAATGTTGGTTAAGTCCCCTAACGAGCGCAACCCTTA  
Kp\_16S GCTGTGCTCAGCTCGTGTGCTGAAATGTTGGTTAAGTCCCCTAACGAGCGCAACCCTTA  
\*\*\*\*\*

PsA\_16S TCCTTAGTTACCAGCACCTCGGGTGGGCACTCTAAGGAGACTGCCGGTGACAAACCGGAG  
Ec\_16S TCCTTTGTTGCCAGCGGTCCGGCCGGAACTCAAAGGAGACTGCCAGTGATAAACTGGAG  
Kp\_16S TCCTTTGTTGCCAGCGGTTCGGCCGGAACTCAAAGGAGACTGCCAGTGATAAACTGGAG  
\*\*\*\*\* \*\* \* \*\*\*\*\* \*\* \* \*\* \* \*\*\*\*\* \*\*\*\*\* \*\* \* \*\* \* \*\* \*

PsA\_16S GAAGGTGGGGATGACGTCAA**GTATCATGGCCCTTACGGCCAGGGCTACACACGTGCTAC**  
Ec\_16S GAAGGTGGGGATGACGTCAAAGTCATCATGGCCCTTACGaCCAGGGCTACACACGTGCTAC  
Kp\_16S GAAGGTGGGGATGACGTCAAGTCATCATGGCCCTTACGaCCAGGGCTACACACGTGCTAC  
\*\*\*\*\*

PsA\_16S **AATGGTTCGGTACAAAGGTTGCCAAGCCGCGAGGTGGAGCTAATCCATAAAACCGATCG**  
Ec\_16S AATGGcgcataCAAAAGaGaaGCgAcctCGCGAGagcaAGCggAcCtCATAAAgtgCGTCG  
Kp\_16S AATGGcataTACAAAGaGaaGCgAcctCGCGAGagcaAGCggAcCtCATAAAgtatgTCG  
\*\*\*\*\* \* \* \* \* \* \*\*\*\*\* \*\* \* \* \* \*\*\*\*\* \*\* \*

PsA\_16S TAGTCCGGATCGCAGTCTGCAACTCGACTGCGTGAAGTCGGAATCGCTAGTAATCGTGAA  
Ec\_16S TAGTCCGGATTGGAGTCTGCAACTCGACTCCATGAAGTCGGAATCGCTAGTAATCGTGGA  
Kp\_16S TAGTCCGGATTGGAGTCTGCAACTCGACTCCATGAAGTCGGAATCGCTAGTAATCGTAGA  
\*\*\*\*\* \* \* \* \* \* \*\*\*\*\* \* \* \* \* \* \*\*\*\*\* \* \* \* \* \* \*\*\*\*\* \*

PsA\_16S TCAGAATGTCACGGTGAATACGTTCCCGGGCCTTGTACACACCGCCCGTCACACCATGGG  
Ec\_16S TCAGAATGCCACG**GTGAATACGTTCCCGGGCCTTGTACACACCGCCCGTCACACCATGGG**  
Kp\_16S TCAGAATGCTACG**GTGAATACGTTCCCGGGCCTTGTACACACCGCCCGTCACACCATGGG**  
\*\*\*\*\* \* \* \* \* \* \*\*\*\*\* \* \* \* \* \* \*\*\*\*\* \* \* \* \* \* \*\*\*\*\*

PsA\_16S AGTGGGTTGctccAGAAGTAGctAGtctAACCGcaGGgGgaCGgTTACCACgGAGTGAT  
Ec\_16S **AGTGGGTTGCAAAAGAAGTAGTACGTTAACCTTCGGGAGGGCGCTTACCACT**TTGTGAT  
Kp\_16S **AGTGGGTTGCAAAAGAAGTAGTACGTTAACCTTCGGGAGGGCGCTTACCACT**TTGTGAT  
\*\*\*\*\* \* \* \* \* \* \*\*\*\*\* \*\* \* \* \* \* \* \*\*\*\*\* \*\* \* \* \* \*\*\*\*\*

PsA\_16S TCATGACTGGGGTGAAGTCGTAACAAGGTAGCCGTAGGGGAACCTGCGGCTGGATCACCT  
Ec\_16S TCATGACTGGGGTGAAGTCGTAACAAGGTAAACCGTAGGGGAACCTGCGGTTGGATCACCT  
Kp\_16S TCATGACTGGGGTGAAGTCGTAACAAGGTAAACCGTAGGGGAACCTGCGGTTGGATCACCT  
\*\*\*\*\*

PsA\_16S CCTTAATCGAAGATCTCAGCTTCTTCATAAGCTCCACACGAA-----TTGCTTGATTCA  
Ec\_16S CCTTACCTTAAAGAAGCGTCTTTGAAGTGCTCACACAGATTGTCTGATGAAAATGAGAA  
Kp\_16S CCTTACCTTAAAGAATCTGCCTTTGCAGTGCTCACACAGATTGTCTGATGAAAAACAGCA  
\*\*\*\*\* \*\* \* \* \* \* \* \* \* \* \* \* \* \* \* \* \* \* \* \* \* \* \* \* \* \* \* \*

PsA\_16S CTGGTTAGACGATTGGGTCTGTAGCTCAGTTGGTTAGAGCGCACCCCTGATAAGGGTGAG  
Ec\_16S GT-AAAACCTCTACAGGCTTGTAGCTCAGTTGGTTAGAGCGCACCCCTGATAAGGGTGAG  
Kp\_16S GTAAAACCTCTACAGGCTTGTAGCTCAGTTGGTTAGAGCGCACCCCTGATAAGGGTGAG  
\* \* \* \* \* \*\*\*\*\*

PsA\_16S GTCGGCAGTTCGAATCTGCCAGACCCACCAATTGTTGGTGTGCTG-----  
Ec\_16S GTCGGTGGTTCAGTCCACTCAGGCTACCAAATTTGCACGGCAAATTTGAAGAGGTTTT  
Kp\_16S GTCGGTGGTTCAGTCCACTCAGGCTACCAAATTTGCGAAGCAAATTTGAAGAGGTTGC  
\*\*\*\*\* \* \* \* \* \* \* \* \* \* \* \* \* \* \* \* \* \* \* \* \* \* \* \* \* \* \*

PsA\_16S CGTGATCCGATACGGGGCCATAGCTCAGCTGGGAGAGCGCCTGCTTTGCACGCAGGAGGT  
Ec\_16S AACTACATGTTATGGGGCTATAGCTCAGCTGGGAGAGCGCCTGCTTTGCACGCAGG----  
Kp\_16S AAA-----CGATGGGGCTATAGCTCAGCTGGGAGAGCGCCTGCTTTGCACGCAGGAGGT  
\* \* \* \* \* \*\*\*\*\*

PsA\_16S CAGGAGTTCGATC  
Ec\_16S -----  
Kp\_16S CTGCGG-----



PsA\_23S GACTGGAGGACCGAACCCACTCCCCTTAAAAAGGTAGGGGATGACTTGTGGATCGGAGTG  
Ec\_23S AACTGGAGGACCGAACCCACTAATGTTGAAAAATTAGCGGATGACTTGTGGCTGGGGGTG  
Kp\_23S AACTGGAGGACCGAACCCACTAATGTTGAAAAATTAGCGGATGACTTGTGGCTGGGGGTG  
\*\*\*\*\* \*\* \*\*\*\*\* \*\*

PsA\_23S AAAGGCTAATCAAGCTCGGAGATAGCTGGTTCTCCTCGAAAGCTATTTAGGTAGCGCCTC  
Ec\_23S AAAGGCCAATCAAACCGGGAGATAGCTGGTTCTCCCCGAAAGCTATTTAGGTAGCGCCTC  
Kp\_23S AAAGGCCAATCAAACCGGGAGATAGCTGGTTCTCCCCGAAAGCTATTTAGGTAGCGCCTC  
\*\*\*\*\* \*\* \*\*\*\*\*

PsA\_23S ATGTATCACTCT-GGGGGGTAGAGCACTGTTTCGGCTAGGGGGTCATCCCGACTTACCAA  
Ec\_23S GTGAATTCATCTCCGGGGGTAGAGCACTGTTTCGGCAAGGGGGTCATCCCGACTTACCAA  
Kp\_23S GTGAATTCATCTCCGGGGGTAGAGCACTGTTTCGGCTAGGGGGTCATCCCGACTTACCAA  
\*\* \*\* \*\* \*\*\*\*\*

PsA\_23S ACCGATGCAAACCTCCGAATACCCAGAAGTGCCGAGCATGGGAGACACACGGCGGGTGCTA  
Ec\_23S CCCGATGCAAACCTCCGAATACCCGAGAATG-TTATCACGGGAGACACACGGCGGGTGCTA  
Kp\_23S CCCGATGCAAACCTACGAATACCCGAAGAATG-TTATCACGGGAGACACACGGCGGGTGCTA  
\*\*\*\*\* \*\*\*\*\* \*\* \* \*\* \*\*\*\*\*

PsA\_23S ACGTCCGTCGTGAAAAGGGAAACAACCCAGACCAGCTAAGGTCCCAAAGTTGTGGTT  
Ec\_23S ACGTCCGTCGTGAAGAGGGAAACAACCCAGACCAGCTAAGGTCCCAAAGTCATGGTT  
Kp\_23S ACGTCCGTCGTGAAGAGGGAAACAACCCAGACCAGCTAAGGTCCCAAAGTCATGGTT  
\*\*\*\*\* \*\*\*\*\* \*\*\*\*\*

PsA\_23S AAGTGGTAAACGATGTGGGAAGGCTTAGACAGCTAGGAGGTTGGCTTAGAAGCAGCCACC  
Ec\_23S AAGTGGGAAACGATGTGGGAAGGCCAGACAGCCAGGATGTTGGCTTAGAAGCAGCCATC  
Kp\_23S AAGTGGGAAACGATGTGGGAAGGCACAGACAGCCAGGATGTTGGCTTAGAAGCAGCCATC  
\*\*\*\*\* \*\*\*\*\* \*\*\*\*\* \*\*\*\*\* \*\*\*\*\*

PsA\_23S CTTTAAAGAAAGCGTAATAGCTCACTAGTCGAGTCGGCCTGCGCGGAAGATGTAACGGGG  
Ec\_23S ATTTAAAGAAAGCGTAATAGCTCACTGGTCGAGTCGGCCTGCGCGGAAGATGTAACGGGG  
Kp\_23S ATTTAAAGAAAGCGTAATAGCTCACTGGTCGAGTCGGCCTGCGCGGAAGATGTAACGGGG  
\*\*\*\*\* \*\*\*\*\* \*\*\*\*\*

PsA\_23S CTCAAACCACACACCGAAGC--TGCGGGTGTACGTAAGTGACGCGGTAGAGGAGCGTTC  
Ec\_23S CTA AACCATGCACCGAAGCTGCGGCAGCGACACTGTGTGTTGTTGGGTAGGGAGCGTTC  
Kp\_23S CTA AACCATGCACCGAAGCTGCGGCAGCGACACTATGTGTTGTTGGGTAGGGAGCGTTC  
\*\* \*\* \* \* \* \*\* \* \*\* \*\*\*\*\*

PsA\_23S TGTAAGCCTGTGAAGGTGaGtTgAaGcTtGCTGAGGTATCAGAAGTGCGAATGCTGA  
Ec\_23S TGTAAGCCTGCGAAGGTGTGCTGTGAGGCATGCTGGAGGTATCAGAAGTGCGAATGCTGA  
Kp\_23S TGTAAGCCTGCGAAGGTGTGCTGTGAGGCATGCTGGAGGTATCAGAAGTGCGAATGCTGA  
\*\*\*\*\* \*\*\*\*\* \* \*\* \*\* \*\*\*\*\*

PsA\_23S CATgAGTAACGAcAAtGgGtGTGAAAAaCaCcCaCGCCGaAAGACCAAGGGTTCCTGCGC  
Ec\_23S CATAAGTAACGATAAAGCGGGTGAAAAGCCCGCTCGCCGGAAGACCAAGGGTTCCTGTCC  
Kp\_23S CATAAGTAACGATAAAGCGGGTGAAAAGCCCGCTCGCCGGAAGACCAAGGGTTCCTGTCC  
\*\*\* \*\*\*\*\* \*\* \* \* \*\*\*\*\* \* \* \*\*\*\*\*

PsA\_23S AACGTTAATCGACGCAGGGTTAGTCGGTTCCTAAGGCGAGGCTGAAAAGCGTAGTCGATG  
Ec\_23S AACGTTAATCGGGGCAGGGTGTAGTCGACCCCTAAGGCGAGGCCGAAAGGCGTAGTCGATG  
Kp\_23S AACGTTAATCGGGGCAGGGTGTAGTCGACCCCTAAGGCGAGGCCGAAAGGCGTAGTCGATG  
\*\*\*\*\* \*\*\*\*\* \*\*\*\*\* \*\*\*\*\* \*\*\*\*\*

PsA\_23S GGAAACAGGTTAATATTCTGTACTTCTGGTTACTGCGATGGAGGGACGGAGAAGGCTAG  
Ec\_23S GGAAACAGGTTAATATTCTGTACTTggtGTTACTGCGAaGgGGGACGGAGAAGGCTAT  
Kp\_23S GGAAACAGGTTAATATTCTGTACTTggtGTTACTGCGAaGgGGGACGGAGAAGGCTAT  
\*\*\*\*\* \*\*\*\*\* \*\* \*\*\*\*\*

PsA\_23S GCCAGCTTGGCGTTGGTTGTCCAAGTTTAAAGTGGTAGGCTGAAATCTTAGGTAATCCG  
Ec\_23S GttGGCcgGGCGacGgTtGTCCcgGTTTAAGcgtGTAGGCTGgTtTtcTAGGCAAATCCG  
Kp\_23S GttAGCcgGGCGacGgTtGTCCcgGTTTAAGcatGTAGGCTGatGtCcAGGCAAATCCG  
\* \*\* \*\* \*\*\*\*\* \*\*\*\*\* \*\*\*\*\* \*\*\*\*\* \*\*\*\*\*



PsA\_23S GGGTTTCAAGGCCGAGAGCTGATGACGAGTCGTCTTTTAGATGACGAAGTGTTGATGCC  
Ec\_23S GAAAATCAAGGCTGAGGCGTGATGACGAGGCA---CTACGGTGCTGAAGCAACAAATGCC  
Kp\_23S GATAATCAAGGCTGAGGTGTGATGACGAGGCA---CTACGGTGCTGAAGTAACAAATGCC  
\*       \*\*\*\*\*   \*       \*\*\*\*\*   \*       \*   \*   \*       \*\*\*\*\*

PsA\_23S ATGCTTCCAAGAAAAGCTTCTAAGCTTCAGGTAACCAGGAACCGTACCCCAACCGACAC  
Ec\_23S CTGCTTCCAGGAAAAGCCTCTAAGCATCAGGTAACATCAAATCGTACCCCAACCGACAC  
Kp\_23S CTGCTTCCAGGAAAAGCCTCTAAGCATCAGGTAACATCAAATCGTACCCCAACCGACAC  
\*\*\*\*\*   \*\*\*\*\*   \*\*\*\*\*   \*\*\*\*\*       \*\*   \*\*\*\*\*

PsA\_23S AGGTGGTCGGGTAGAGAATACCAAGGCGCTTGAGAGAACTCGGGTGAAGGAACTAGGCAA  
Ec\_23S AGGTGGTCAGGTAGAGAATACCAAGGCGCTTGAGAGAACTCGGGTGAAGGAACTAGGCAA  
Kp\_23S AGGTGGTCAGGTAGAGAATACCAAGGCGCTTGAGAGAACTCGGGTGAAGGAACTAGGCAA  
\*\*\*\*\*

PsA\_23S AATGGCACCGTAACTTCGGGAGAAGGTGCGCCGGCTAGGGTGAAG---GATTTACTCCGT  
Ec\_23S AATGGTGCCGTAACCTTCGGGAGAAGGCACGCTGATATGTAGGTGAAGTCCCTCGCGGATG  
Kp\_23S AATGGTGCCGTAACCTTCGGGAGAAGGCACGCTGGTGTGTAGGTGAAGTCCCT-GCGGATG  
\*\*\*\*\*   \*\*\*\*\*       \*\* \*       \*   \*       \*   \*

PsA\_23S AAGCTCTGGCTGGTCAAGATACCAGGCCGTGCGACTGTTTATTA AAAACACAGCACTG  
Ec\_23S GAGCTGAAATCAGTCAAGATACCAGCTGGCTGCAACTGTTTATTA AAAACACAGCACTG  
Kp\_23S GAGCTGAGACCAGTCAAGATACCAGCTGGCTGCAACTGTTTATTA AAAACACAGCACTG  
\*\*\*       \*\*\*\*\*       \*\*\*\*\*   \*\*\*\*\*

PsA\_23S TGCAAACACGAAAGTGGACGTATAGGGTGTGACGCCTGCCCGGTGCCGGAAGGTTAATTG  
Ec\_23S TGCAAACACGAAAGTGGACGTATACGGTGTGACGCCTGCCCGGTGCCGGAAGGTTAATTG  
Kp\_23S TGCAAACACGAAAGTGGACGTATACGGTGTGACGCCTGCCCGGTGCCGGAAGGTTAATTG  
\*\*\*\*\*

PsA\_23S ATGGGGTTAGCGC---AAGCGAAGCTCTTGATCGAAGCCCCGGTAAACGGCGGCCGTAAC  
Ec\_23S ATGGGGTCAGCGC---AAGCGAAGCTCTTGATCGAAGCCCCGGTAAACGGCGGCCGTAAC  
Kp\_23S ATGGGGTTATCCGTAAGGAGAAGCTCTTGATCGAAGCCCCGGTAAACGGCGGCCGTAAC  
\*\*\*\*\* \* \*       \* \*   \*\*\*\*\*

PsA\_23S ATAACGGTCCTAAGGTAGCGAAATTCCTTGTGCGGGTAAGTCCGACCTGCACGAATGGCG  
Ec\_23S ATAACGGTCCTAAGGTAGCGAAATTCCTTGTGCGGGTAAGTCCGACCTGCACGAATGGCG  
Kp\_23S ATAACGGTCCTAAGGTAGCGAAATTCCTTGTGCGGGTAAGTCCGACCTGCACGAATGGCG  
\*\*\*\*\*

PsA\_23S TAACGATGGCGCGCTGTCTCCACCCGAGACTCAGTGA AATTGAAATCGCTGTGAAGATG  
Ec\_23S TAATGATGGCCAGGCTGTCTCCACCCGAGACTCAGTGA AATTGAAATCGCTGTGAAGATG  
Kp\_23S TAATGATGGCCAGGCTGTCTCCACCCGAGACTCAGTGA AATTGAAATCGCTGTGAAGATG  
\*\*\*   \*\*\*\*\*       \*\*\*\*\*

PsA\_23S CAGTGTATCCGCGGCTAGACGGAAGACCCCGTGAACCTTTACTGTAGCTTTGCACTGGA  
Ec\_23S CAGTGTACCCGCGCAAGACGGAAGACCCCGTGAACCTTTACTATAGCTTGACACTGAA  
Kp\_23S CAGTGTACCCGCGCAAGACGGAAGACCCCGTGAACCTTTACTATAGCTTGACACTGAA  
\*\*\*\*\*   \*\*\*\*\*   \*\*\*\*\*       \*\*\*\*\*   \*\*\*\*\*

PsA\_23S CTTT GAGCCTGTGTGTAGGATAGGTGGGAGGCTTTGAAGCGTGGACGCCAGTTTCGCGT  
Ec\_23S CATTGAGCCTGTGATGTGTAGGATAGGTGGGAGGCTTTGAAGTGTGGACGCCAGTTTCGCGT  
Kp\_23S CATTGAGCCTGTGATGTGTAGGATAGGTGGGAGGCTTTGAAGCGTGGACGCCAGTTTCGCGT  
\*   \*\*\*\*\*       \*\*\*\*\*       \*\*\*\*\*       \*\* \*

PsA\_23S GGAGCCATCCTTGAAATACCACCCTGGCATGCTTGAGGTTCTAACTCTGGTCCGTAATCC  
Ec\_23S GGAGCCGACCTTGAAATACCACCCTTTAATGTTTGTGATGTTCTAACGTTGACCCGTGATCC  
Kp\_23S GGAGCCAACCTTGAAATACCACCCTTTAATGTTTGTGATGTTCTAACGTTGGCCCTGACCC  
\*\*\*\*\*   \*\*\*\*\*       \*\* \*       \*\*\*\*\*   \*\* \* \* \* \*

PsA\_23S GGATCGAGGACAGTGTATGGTGGGAGTTTACTGGGCGGTCTCCTCCTAAAGAGTAAC  
Ec\_23S GGGTTGCGGACAGTGTCTGGTGGGTAGTTTACTGGGCGGTCTCCTCCTAAAGAGTAAC  
Kp\_23S GGGTTGCGGACAGTGTCTGGTGGGTAGTTTACTGGGCGGTCTCCTCCTAAAGAGTAAC  
\*\* \* \*   \*\*\*\*\*       \*\*\*\*\*       \*\*\*\*\*       \*\*\*\*\*       \*\*\*\*\*

PsA\_23S GGAGGAGTACGAAGGTGCGCTCAGACCGGTCCGAAATCGGTTCGAGAGTATAAAGGCAAA  
Ec\_23S GGAGGAGCACGAAGGTTGGCTAATCTGGTCCGACATCAGGAGGTTAGTGCATGGCATA  
Kp\_23S GGAGGAGCACGAAGGTTAGCTAATCTGGTCCGACATCAGGAGGTTAGTGCATGGCATA  
\*\*\*\*\*

PsA\_23S AGCGCGCTTACTGCGAGACAGACACGTCGAGCAGGTACGAAAGTAGGTCTTAGTGATCC  
Ec\_23S AGCCAGCTTACTGCGAGCGTGACGGCGCGAGGTGCGAAAGCAGGTTCATAGTGATCC  
Kp\_23S AGCTAGCTTACTGCGAGCGTGACGGCGCGAGCAGGTGCGAAAGCAGGTTCATAGTGATCC  
\*\*\*\*\*

PsA\_23S GGTGGTTCTGTATGGAAGGGCCATCGCTCAACGGATAAAAGGTAAGTACTCCGGGGATAACAGG  
Ec\_23S GGTGGTTCTGAATGGAAGGGCCATCGCTCAACGGATAAAAGGTAAGTACTCCGGGGATAACAGG  
Kp\_23S GGTGGTTCTGAATGGAAGGGCCATCGCTCAACGGATAAAAGGTAAGTACTCCGGGGATAACAGG  
\*\*\*\*\*

PsA\_23S CTGATACCGCCCAAGAGTTCATATCGACGGCGGTGTTTGGCACCTCGATGTCGGCTCATC  
Ec\_23S CTGATACCGCCCAAGAGTTCATATCGACGGCGGTGTTTGGCACCTCGATGTCGGCTCATC  
Kp\_23S CTGATACCGCCCAAGAGTTCATATCGACGGCGGTGTTTGGCACCTCGATGTCGGCTCATC  
\*\*\*\*\*

PsA\_23S ACATCTGGGGCTGAAGCCGGTCCCAAGGGTATGGCTGTTCCGCAATTTAAAGTGGTACGC  
Ec\_23S ACATCTGGGGCTGAAGTAGGTCCCAAGGGTATGGCTGTTCCGCAATTTAAAGTGGTACGC  
Kp\_23S ACATCTGGGGCTGAAGTAGGTCCCAAGGGTATGGCTGTTCCGCAATTTAAAGTGGTACGC  
\*\*\*\*\*

PsA\_23S GAGCTGGGTTTAGAACGTCGTGAGACAGTTCGGTCCCTATCTG**CCGTGGACGTTTGAGAT**  
Ec\_23S GAGCTGGGTTTAGAACGTCGTGAGACAGTTCGGTCCCTATCTGCCGTGGgCGcTgGAGAA  
Kp\_23S GAGCTGGGTTTAGAACGTCGTGAGACAGTTCGGTCCCTATCTGCCGTGGgCGcTgGAGAA  
\*\*\*\*\*

PsA\_23S **TTGAGAGGGGCTGCTCCTAGTACGAGAGGACCGGAGTGGACGAACCTCTGGTGTTCGGT**  
Ec\_23S cTGAGgGGGGCTGCTCCTAGTACGAGAGGACCGGAGTGGACGcAtCaCTGGTGTTCgGGT  
Kp\_23S TTGAGgGGGGCTGCTCCTAGTACGAGAGGACCGGAGTGGACGcAtCaCTGGTGTTCgGGT  
\*\*\*\*\*

PsA\_23S **TGTCACGCCAGTGGCATTGCCGG**GTAGCTATGTTCCGAAAAGATAACCGCTGAAAGCATC  
Ec\_23S TGTCAtGCCAaTGGCAcTGCCcGGTAGCTAAATGCGGAAGAGATAAGTGTGAAAGCATC  
Kp\_23S TGTCAtGCCAaTGGCAcTGCCcGGTAGCTAAATGCGGAAGAGATAAGTGTGAAAGCATC  
\*\*\*\*\*

PsA\_23S TAAGCGGAAACTTGCCCTCAAGATGAGATCTCACTGGGAacTTgAtTCcCCTGAAGGgcC  
Ec\_23S TAAGCACGAAACTTGCCCCGAGATGAGTTCTCCCTGA**ctCcTTgAGagTCCTGAAGGAAC**  
Kp\_23S TAAGCACGAAACTTGCCCCGAGATGAGTTCTCCCTGA**GACTTTAAGTCTCCTGAAGGAAC**  
\*\*\*\*\*

PsA\_23S GTcgAAGACtAcGACGTTGATAGGcTGGGTGTGTAAGCGttGTGAgGCGTTGAGCTAACC  
Ec\_23S **GTTgAAGACGAcGACGTTGATAGGCCGGGTGTGTAAGCGCAGCGATGCGTTGAGCTAACC**  
Kp\_23S **GTTAAAGACGATGACGTTGATAGGCCGGGTGTGTAAGCGCAGCGATGCGTTGAGCTAACC**  
\*\*\*\*\*

PsA\_23S aGTACTAATtgcCCGTGAGGCTTGACCAT--  
Ec\_23S **GGTACTAATGAACCGTGAGGCTTAACCTT--**  
Kp\_23S **GGTACTAATGAACCGTGAGGCTTAACCTTAC**  
\*\*\*\*\*

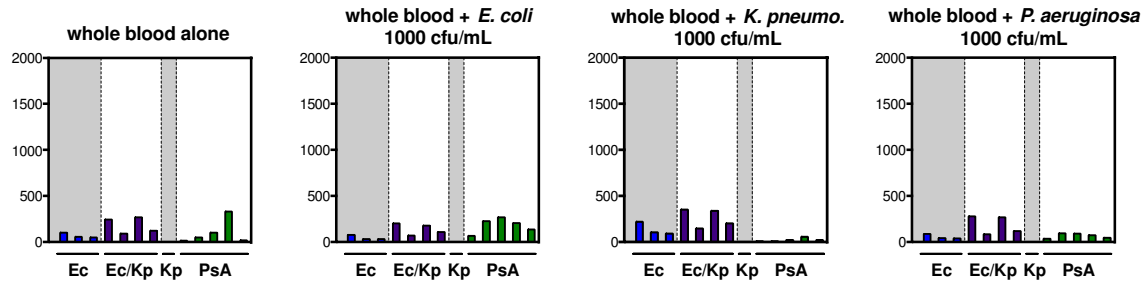

**Figure S6** Similar background transcriptional signals from nCounter probes between whole blood and whole blood spiked with 1000 cfu/mL for different bacteria strains.

## SI Movie Legends

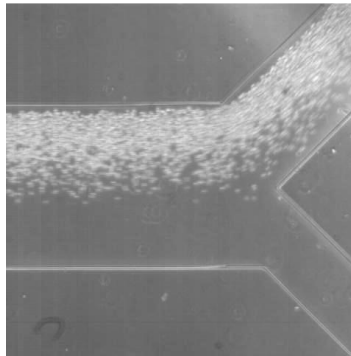

### Movie S1

High speed video (6400 fps) illustrating inertial focusing of RBCs (3x diluted whole blood, ~15% hct) at the inner channel wall at DC 1 and continuous collection into the waste outlet (upper).

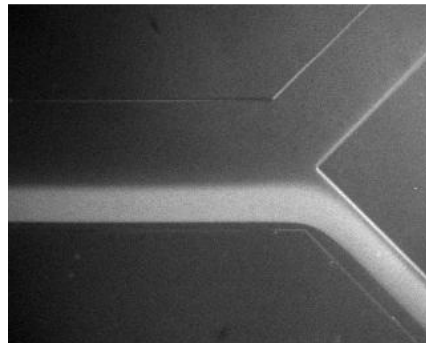

### Movie S2

Fluorescent video illustrating focusing of Alexa Fluor® 488 *E. coli* (K-12 strain) BioParticles® conjugates spiked in PBS at the outer wall at DC 1 and collection into the bacterial outlet (bottom).

**Table S1.** Sequences for rRNA probes targeting the 16S or 23S rRNA subunits from *E. coli*, *K. pneumoniae*, or *P. aeruginosa*. Nucleotide positions are relative to the annotated reference genome sequences of *E. coli* strain EcHS, *K. pneumoniae* strain MGH78578, and *P. aeruginosa* strain PAO1, respectively, from the NCBI database.

| PROBE                    | SPECIES RECOGNIZED   | GENE                                      | NUCLEOTIDES | PROBE 1 SEQUENCE                                                                                      | PROBE 2 SEQUENCE                                                                                        |
|--------------------------|----------------------|-------------------------------------------|-------------|-------------------------------------------------------------------------------------------------------|---------------------------------------------------------------------------------------------------------|
| <i>E. coli</i>           | Ec_1                 | <i>E. coli</i>                            | 16S rRNA    | 5-105                                                                                                 | TGTTAGGCGCTGCCCGCAGCGTTCAATCTGAGCCATGATCAAACTCTTCCACTCGTACGGAAACACAGCAAGCTGGCTTCCTGTTCACCGTTTCGACTTGCA  |
|                          | Ec_2                 | <i>E. coli</i>                            | 16S rRNA    | 935-1035                                                                                              | GGTAAAGGTTCTTTCGCGTTGCAFCGAATTAACCCACATGCTCCACCGGCTTCCCGAAGGCACATTCTCATCTCTGAAACATCCCGTGGATGTCAAGACCA   |
|                          | Ec_3                 | <i>E. coli</i>                            | 23S rRNA    | 254-354                                                                                               | ACGCTTCCACTAACACACACACTGATTCAGGCTCTGGGCTGCCCGTGTGTCATTTTTGTGTACGGGGCTGTACCCCTGTATCGCACGCCCTTTCCAG       |
| <i>Klebs. pneumoniae</i> | Ec/Kp_1              | <i>E. coli</i> , <i>Klebs. pneumoniae</i> | 16S rRNA    | 1370-1470                                                                                             | ACTCCCATGGTGTGACGGGGCGGTGTGTACAAAGGCCCGGAACTGATTCAGTGGTAAAGCGCCCTCCCGAAGGTTAAGCTACCTACTTCTTTTGCAACCC    |
|                          | Ec/Kp_2              | <i>E. coli</i> , <i>Klebs. pneumoniae</i> | 23S rRNA    | 5-105                                                                                                 | CTTTCATCGCCTCTGACTGCCAGGGCATCCACCGTGTACGCTTAGTCGGCTGTAAACGGTTCATATCACCTTACCGACGCTTTTCGACAGATTAGCAGT     |
|                          | Ec/Kp_3              | <i>E. coli</i> , <i>Klebs. pneumoniae</i> | 23S rRNA    | 1210-1310                                                                                             | ATGTACAGCAATCCGACTTCTGTATACCTCCAGCATGCCCTCACACACACAAACCCCTTGGTCTTCCGGGAGCGGGCTTTTACCCGCTTTATTCGTTACTTT  |
|                          | Ec/Kp_4              | <i>E. coli</i> , <i>Klebs. pneumoniae</i> | 23S rRNA    | 2790-2890                                                                                             | CGGCCTATCAACGTCGTCGCTCTTCAAGTTCTTCAGGACTTAAAGTACAGGTTCAATAGTACCCGGTTAGCTCAACGGCATCGCTGGCTTACACACC       |
| <i>P. aeruginosa</i>     | Kp_1                 | <i>Klebs. pneumoniae</i>                  | 23S rRNA    | 260-360                                                                                               | TTCCAGACCGTTCCACTAACACACAAAGCTGATTCAGACTCTGGGCTGCTACAGCCCTGTCATTTTTGGTGTAGGGGACTATCACCCCTGTACCCGTCGGACT |
|                          | PsA_1                | <i>P. aeruginosa</i>                      | 16S rRNA    | 165-265                                                                                               | CATCTGATAGCGTGAGGTCGGAAGAATCCCCACATTTCTCCCTCAGGACCGTCCCTTGGTAGGCGCTTTACCCACCAACTAGCTAAATCCGACCTAGGCT    |
|                          | PsA_2                | <i>P. aeruginosa</i>                      | 16S rRNA    | 1190-1290                                                                                             | ACCGACCAATTGTAGCACGCTGTGTAGCCCTGGCCGTAAGGGCCATGATGACGATCGGTTTTTATGGGATTAGCTCCACCTCGGGCTTGGCAACCCCTTTGT  |
|                          | PsA_3                | <i>P. aeruginosa</i>                      | 23S rRNA    | 525-625                                                                                               | CGCTGACCCATTATACAAAAGGTACGCAGTCAACCTAAACAAGTAGGCTCGCTTTCGCTACGCCCTACCCCTATACGGTTAAGCTTCCCACTGAATATAAGT  |
|                          | PsA_4                | <i>P. aeruginosa</i>                      | 23S rRNA    | 1375-1475                                                                                             | AGCCTTCTCGTCCCTCCATCGCAGTAAACCAAGTACAGGAATATTAAAGATTTACGCTAACACCTTAAACTTGGACAACCAACGGCAAGCTGGCT         |
| PsA_5                    | <i>P. aeruginosa</i> | 23S rRNA                                  | 2605-2705   | CGGTCTCTCGTACTAGGAGCAGCCCTCTCAAAATCTCAAAACGTCCACCGGCAATGCCACTGGCTGTGACAAACCGGAAACACCAGAGGTTCTGTCCACTC |                                                                                                         |

**Table S2.** Sequences for mRNA probes targeting ciprofloxacin-responsive ("R\_") and control ("C\_") transcripts from *E. coli*. Nucleotide position is relative to the annotated reference genome sequence of *E. coli* strain EchS from the NCBI database.

| PROBE | GENE              | NUCLEOTIDES | PROBE 1 SEQUENCE                                                                                       | PROBE 2 SEQUENCE                                      |
|-------|-------------------|-------------|--------------------------------------------------------------------------------------------------------|-------------------------------------------------------|
| R_1   | <i>phoB</i>       | 50-150      | CTTCCGCTTCGACCCGGGTGAAAGCCATTTTGTTCGAGCACGAAGCAGACAAATTAAATCCGGCCAGGGTTCATTCAGTTGATTCACAGCACTGTCAATAAT | AGGGACCTTTCGTGATGATTCACCCGCATGTTTCACGATCGCTAACCCCTAA  |
| R_2   | <i>phoR</i>       | 1114-1214   | TCCGCTACCGCCGGTTTGCCGGGAACGGCTTTATCAACGCGATAAAAAATAGACAACCTTCACTGATAAGCCCGCTGTAGTGTTCCTGTAGAGACA       | GTAACAATGGCAACAGTAGAAGTTGCCTCATCATGGGCTGATCTTCGGCGA   |
| R_3   | <i>sulA</i>       | 63-163      | GACATTTTCTCTTCGCCCTCACGATGACTACGTATTTAAGCTTCAACCC                                                      | CCGTATCAAGCATTTTGTCAATAGCATCGGCTTCCCTTTTGGCTGGTAAAC   |
| R_4   | <i>yebG</i>       | 3-103       | ATGGAACGGTCTTCAACCAGGCGCATGATGGAGCCTTTACCAAAATGTT                                                      | CAAGCCGATATCCAGTGAAGCCGAACCCGGTAGAGATGGTTTCCACATCC    |
| R_5   | <i>recA</i>       | 57-157      | GTTCAGTTCTTCAAATGGTGATTTCTGTAAAAGCCAGTCGGCTCTCCAGC                                                     | AGATGATCGCGCAGTTTTCGCCATCTCCATTTCAITGAGCGGTCACCCGTGAC |
| R_6   | <i>EchS_A3544</i> | 34-134      | GAAAATGGCGTTGATGTACTTGATTAAGGTAAATGCCATCGCCCGTACTTA                                                    | AGAAATCGCCGGGTGTTGTTCATGGTCAGAACAAATAATCGACAGGCTTGG   |
| C_1   | <i>rcsB</i>       | 220-320     | GTTCCGGCGCTTCGAAAGAGATAACCTTGGTAAFAAATAACGTTGGATCTGC                                                   | AGATCAAGTTTAACTTCTGGTTGCCAATCTTTCITGGAAAAACGTGCGGGCGC |
| C_2   | <i>secB</i>       | 31-131      | TTTCACGTCACAGGCGCAATTCAGAACCGACACGGTACAGAGAACTTA                                                       | GCGTCAACGTACTTCGAGGGTTCAGACGACACCGGAAATCGGTGACGATGTC  |
| C_3   | <i>hflC</i>       | 361-461     |                                                                                                        |                                                       |
